# Supplementary material
Source: PubMed Central journal article supplement (PMC9924099)
Supplement: NIHMS1857190-supplement-Compounds_characterization_checklist.pdf [file NIHMS1857190-supplement-Compounds_characterization_checklist.pdf]

| COMPOUND                                   | IDENTITY |       |                     |    |        |        |         |     |    |      |                         | PURITY                            |                              |                                    |   |                    | BIOMEDICAL TEST                     |   |   |          |         |   |            |  |
|--------------------------------------------|----------|-------|---------------------|----|--------|--------|---------|-----|----|------|-------------------------|-----------------------------------|------------------------------|------------------------------------|---|--------------------|-------------------------------------|---|---|----------|---------|---|------------|--|
| Compound, structure, or table-entry number | New      | Known | Melting point range | IR | UV-Vis | 1H NMR | 13C NMR | NMR | MS | HRMS | Optical rotation/ORD/CD | Enantiomeric/Diastereomeric ratio | X-ray [ORTEP and CIF in SI*] | Copy of 1H/13C NMR spectrum in SI* | ↔ | Elemental analysis | Quant. GC, HPLC, or electrophoresis | ↔ | ↔ | In vitro | In vivo | ↔ | Other test |  |
|                                            |          |       |                     |    |        |        |         |     |    |      |                         |                                   |                              |                                    |   |                    |                                     |   |   |          |         |   |            |  |
|                                            |          |       |                     |    |        |        |         |     |    |      |                         |                                   |                              |                                    |   |                    |                                     |   |   |          |         |   |            |  |
|                                            |          |       |                     |    |        |        |         |     |    |      |                         |                                   |                              |                                    |   |                    |                                     |   |   |          |         |   |            |  |
|                                            |          |       |                     |    |        |        |         |     |    |      |                         |                                   |                              |                                    |   |                    |                                     |   |   |          |         |   |            |  |
|                                            |          |       |                     |    |        |        |         |     |    |      |                         |                                   |                              |                                    |   |                    |                                     |   |   |          |         |   |            |  |
|                                            |          |       |                     |    |        |        |         |     |    |      |                         |                                   |                              |                                    |   |                    |                                     |   |   |          |         |   |            |  |
|                                            |          |       |                     |    |        |        |         |     |    |      |                         |                                   |                              |                                    |   |                    |                                     |   |   |          |         |   |            |  |
|                                            |          |       |                     |    |        |        |         |     |    |      |                         |                                   |                              |                                    |   |                    |                                     |   |   |          |         |   |            |  |
|                                            |          |       |                     |    |        |        |         |     |    |      |                         |                                   |                              |                                    |   |                    |                                     |   |   |          |         |   |            |  |
|                                            |          |       |                     |    |        |        |         |     |    |      |                         |                                   |                              |                                    |   |                    |                                     |   |   |          |         |   |            |  |
|                                            |          |       |                     |    |        |        |         |     |    |      |                         |                                   |                              |                                    |   |                    |                                     |   |   |          |         |   |            |  |
|                                            |          |       |                     |    |        |        |         |     |    |      |                         |                                   |                              |                                    |   |                    |                                     |   |   |          |         |   |            |  |
|                                            |          |       |                     |    |        |        |         |     |    |      |                         |                                   |                              |                                    |   |                    |                                     |   |   |          |         |   |            |  |
|                                            |          |       |                     |    |        |        |         |     |    |      |                         |                                   |                              |                                    |   |                    |                                     |   |   |          |         |   |            |  |
|                                            |          |       |                     |    |        |        |         |     |    |      |                         |                                   |                              |                                    |   |                    |                                     |   |   |          |         |   |            |  |
|                                            |          |       |                     |    |        |        |         |     |    |      |                         |                                   |                              |                                    |   |                    |                                     |   |   |          |         |   |            |  |
|                                            |          |       |                     |    |        |        |         |     |    |      |                         |                                   |                              |                                    |   |                    |                                     |   |   |          |         |   |            |  |

\* SI = Supporting Information

| COMPOUND                                   | IDENTITY |       |                     |    |        |                    |                     |    |      |                         |                                   |                              | PURITY                                                      |   |                    |                                     | BIOMEDICAL TEST |   |          |         |   |            |
|--------------------------------------------|----------|-------|---------------------|----|--------|--------------------|---------------------|----|------|-------------------------|-----------------------------------|------------------------------|-------------------------------------------------------------|---|--------------------|-------------------------------------|-----------------|---|----------|---------|---|------------|
| Compound, structure, or table-entry number | New      | Known | Melting point range | IR | UV-Vis | <sup>1</sup> H NMR | <sup>13</sup> C NMR | MS | HRMS | Optical rotation/ORD/CD | Enantiomeric/Diastereomeric ratio | X-ray [ORTEP and CIF in SI*] | Copy of <sup>1</sup> H/ <sup>13</sup> C NMR spectrum in SI* | ↔ | Elemental analysis | Quant. GC, HPLC, or electrophoresis | ↔               | ↔ | In vitro | In vivo | ↔ | Other test |
|                                            |          |       |                     |    |        |                    |                     |    |      |                         |                                   |                              |                                                             |   |                    |                                     |                 |   |          |         |   |            |
|                                            |          |       |                     |    |        |                    |                     |    |      |                         |                                   |                              |                                                             |   |                    |                                     |                 |   |          |         |   |            |
|                                            |          |       |                     |    |        |                    |                     |    |      |                         |                                   |                              |                                                             |   |                    |                                     |                 |   |          |         |   |            |
|                                            |          |       |                     |    |        |                    |                     |    |      |                         |                                   |                              |                                                             |   |                    |                                     |                 |   |          |         |   |            |
|                                            |          |       |                     |    |        |                    |                     |    |      |                         |                                   |                              |                                                             |   |                    |                                     |                 |   |          |         |   |            |
|                                            |          |       |                     |    |        |                    |                     |    |      |                         |                                   |                              |                                                             |   |                    |                                     |                 |   |          |         |   |            |
|                                            |          |       |                     |    |        |                    |                     |    |      |                         |                                   |                              |                                                             |   |                    |                                     |                 |   |          |         |   |            |
|                                            |          |       |                     |    |        |                    |                     |    |      |                         |                                   |                              |                                                             |   |                    |                                     |                 |   |          |         |   |            |
|                                            |          |       |                     |    |        |                    |                     |    |      |                         |                                   |                              |                                                             |   |                    |                                     |                 |   |          |         |   |            |
|                                            |          |       |                     |    |        |                    |                     |    |      |                         |                                   |                              |                                                             |   |                    |                                     |                 |   |          |         |   |            |
|                                            |          |       |                     |    |        |                    |                     |    |      |                         |                                   |                              |                                                             |   |                    |                                     |                 |   |          |         |   |            |
|                                            |          |       |                     |    |        |                    |                     |    |      |                         |                                   |                              |                                                             |   |                    |                                     |                 |   |          |         |   |            |
|                                            |          |       |                     |    |        |                    |                     |    |      |                         |                                   |                              |                                                             |   |                    |                                     |                 |   |          |         |   |            |
|                                            |          |       |                     |    |        |                    |                     |    |      |                         |                                   |                              |                                                             |   |                    |                                     |                 |   |          |         |   |            |
|                                            |          |       |                     |    |        |                    |                     |    |      |                         |                                   |                              |                                                             |   |                    |                                     |                 |   |          |         |   |            |
|                                            |          |       |                     |    |        |                    |                     |    |      |                         |                                   |                              |                                                             |   |                    |                                     |                 |   |          |         |   |            |
|                                            |          |       |                     |    |        |                    |                     |    |      |                         |                                   |                              |                                                             |   |                    |                                     |                 |   |          |         |   |            |

\* SI =  
Supporting  
Information

| COMPOUND                                   | IDENTITY |       |                     |    |        |                    |                     |     |    |      | PURITY                  |                                   |                              |                                                             | BIOMEDICAL TEST |                    |                                     |   |   |          |         |   |            |
|--------------------------------------------|----------|-------|---------------------|----|--------|--------------------|---------------------|-----|----|------|-------------------------|-----------------------------------|------------------------------|-------------------------------------------------------------|-----------------|--------------------|-------------------------------------|---|---|----------|---------|---|------------|
| Compound, structure, or table-entry number | New      | Known | Melting point range | IR | UV-Vis | <sup>1</sup> H NMR | <sup>13</sup> C NMR | NMR | MS | HRMS | Optical rotation/ORD/CD | Enantiomeric/Diastereomeric ratio | X-ray [ORTEP and CIF in SI*] | Copy of <sup>1</sup> H/ <sup>13</sup> C NMR spectrum in SI* | ↔               | Elemental analysis | Quant. GC, HPLC, or electrophoresis | ↔ | ↔ | In vitro | In vivo | ↔ | Other test |
|                                            |          |       |                     |    |        |                    |                     |     |    |      |                         |                                   |                              |                                                             |                 |                    |                                     |   |   |          |         |   |            |
|                                            |          |       |                     |    |        |                    |                     |     |    |      |                         |                                   |                              |                                                             |                 |                    |                                     |   |   |          |         |   |            |
|                                            |          |       |                     |    |        |                    |                     |     |    |      |                         |                                   |                              |                                                             |                 |                    |                                     |   |   |          |         |   |            |
|                                            |          |       |                     |    |        |                    |                     |     |    |      |                         |                                   |                              |                                                             |                 |                    |                                     |   |   |          |         |   |            |
|                                            |          |       |                     |    |        |                    |                     |     |    |      |                         |                                   |                              |                                                             |                 |                    |                                     |   |   |          |         |   |            |
|                                            |          |       |                     |    |        |                    |                     |     |    |      |                         |                                   |                              |                                                             |                 |                    |                                     |   |   |          |         |   |            |

\* SI = Supporting Information
