# Supplementary material
Source: PubMed Central journal article supplement (PMC9924099)
Supplement: NIHMS1857190-supplement-Supplementary_Figures_and_Table.pdf [file NIHMS1857190-supplement-Supplementary_Figures_and_Table.pdf]

## **Supporting information (SI)**

### **Adamantyl isothiocyanates as mutant p53 rescuing agents and its structure-activity relationships**

Vladimir Burmistrov<sup>1,2\*</sup>, Rahul Saxena<sup>3</sup>, Dmitry Pitushkin<sup>1</sup>, Gennady M. Butov<sup>1,2</sup>, Fung-Lung Chung<sup>4</sup> and Monika Aggarwal<sup>4\*#</sup>

<sup>1</sup> Volgograd State Technical University, Volgograd, 400005, Russia, <sup>2</sup> Department of Chemistry, Technology and Equipment of Chemical Industry, Volzhsky Polytechnic Institute (branch)

Volgograd State Technical University, Volzhsky, 404121, Russia, <sup>3</sup>Department of Biochemistry and Molecular and Cellular Biology, Georgetown University, Washington, DC 20007,

<sup>4</sup>Department of Oncology, Lombardi Comprehensive Cancer Center, Georgetown University, Washington DC 20007, USA

\*These authors contributed equally to this work

#Corresponding author

## **Contents of SI**

1. Supplementary Figures and Figure Legends
2. Supplementary Table 1
3. Compound Characterization Checklist
4. Molecular Formula Strings

## Supplementary Figures and Figure legends

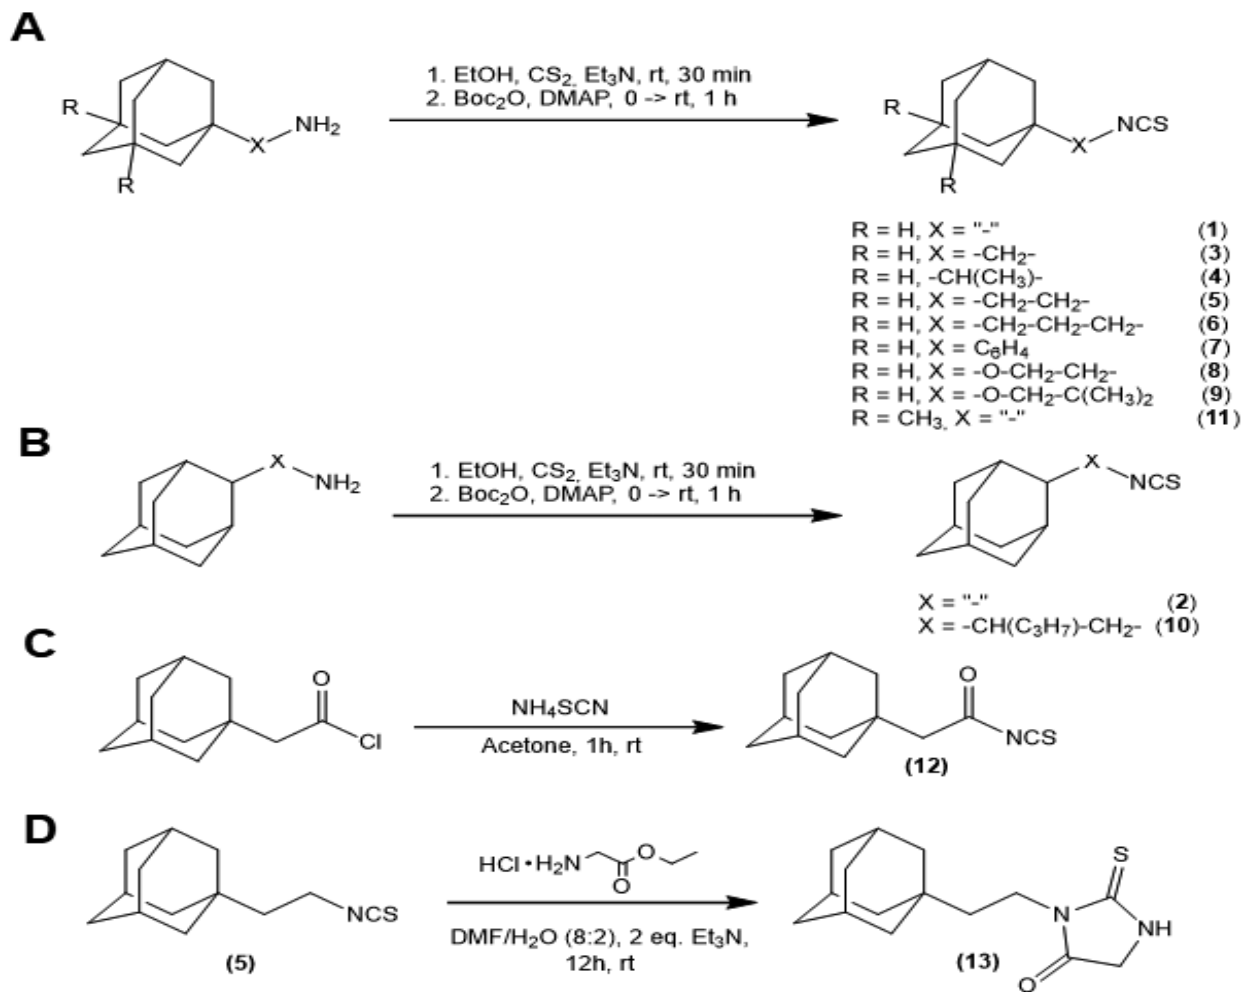

**Figure S1**

**Figure S1. Scheme for the synthesis of Ad-ITCs 1-12 and Ad-compound 13.** (A) Scheme for the synthesis of Ad-ITCs **1**, **3**, **4**, **5**, **6**, **7**, **8**, **9** and **11**. (B) Scheme for the synthesis of Ad-ITCs **2** and **10**. (C) Scheme for the synthesis of Ad-ITC **12**. (D) Scheme for the synthesis of Ad-compound **13**.

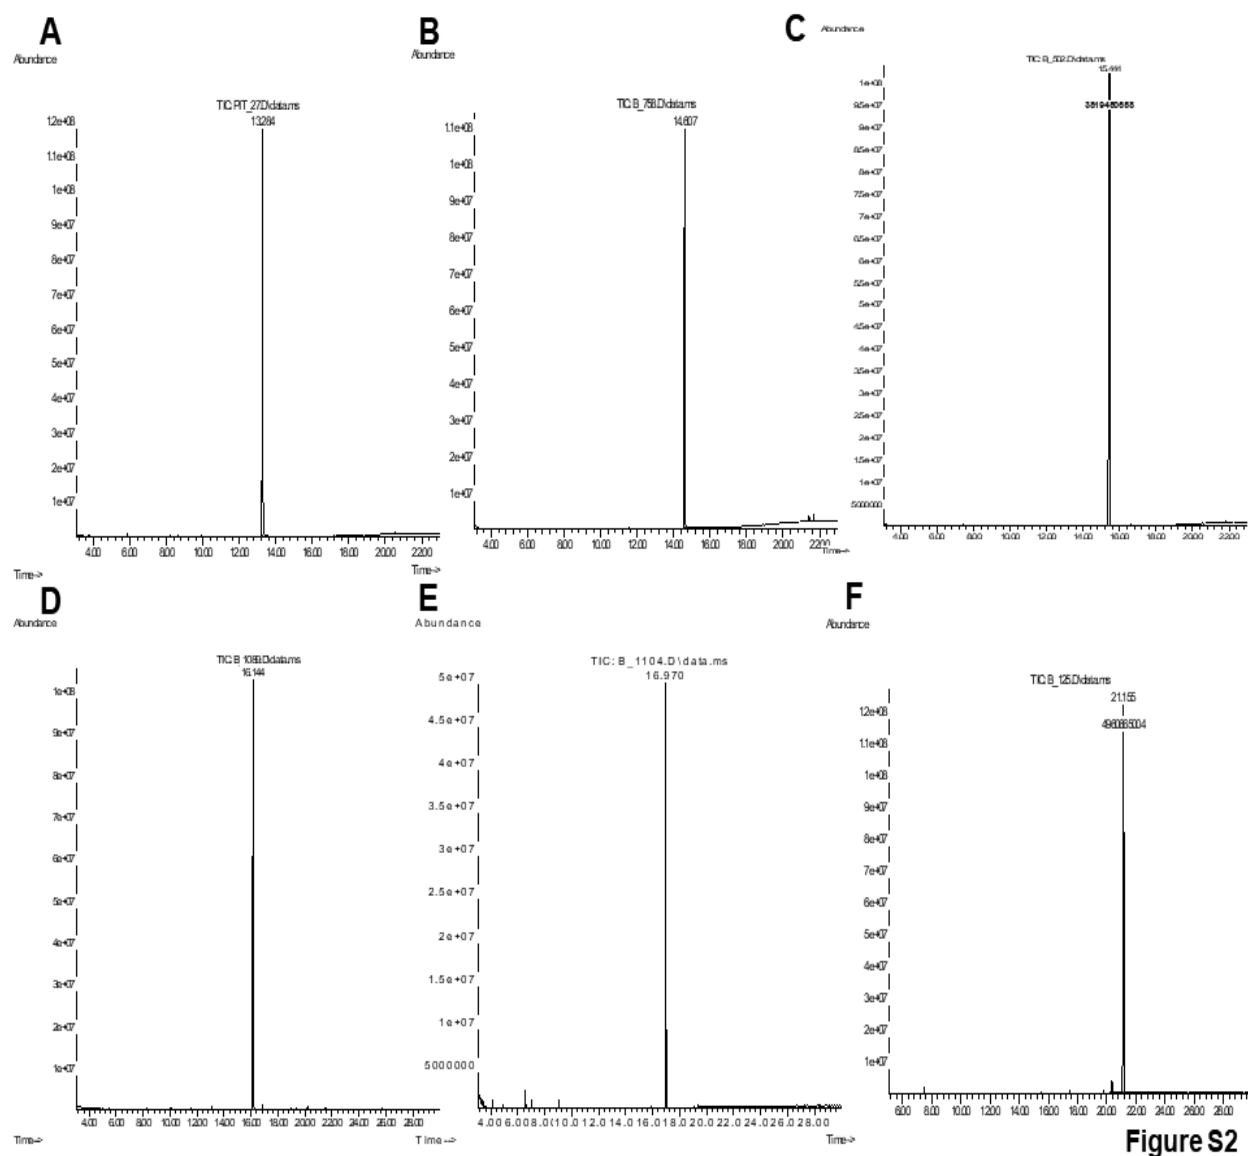

**Figure S2**

**Figure S2. Purification peaks and percentage purity of Ad-ITCs 1 and 3-7 as determined by GC-MS. 1, 99.8% (A), 3, 99.0% (B), 4, 99.7% (C), 5, 99.5% (D), 6, 98.4% (E) and 7, 98.0% (F).**

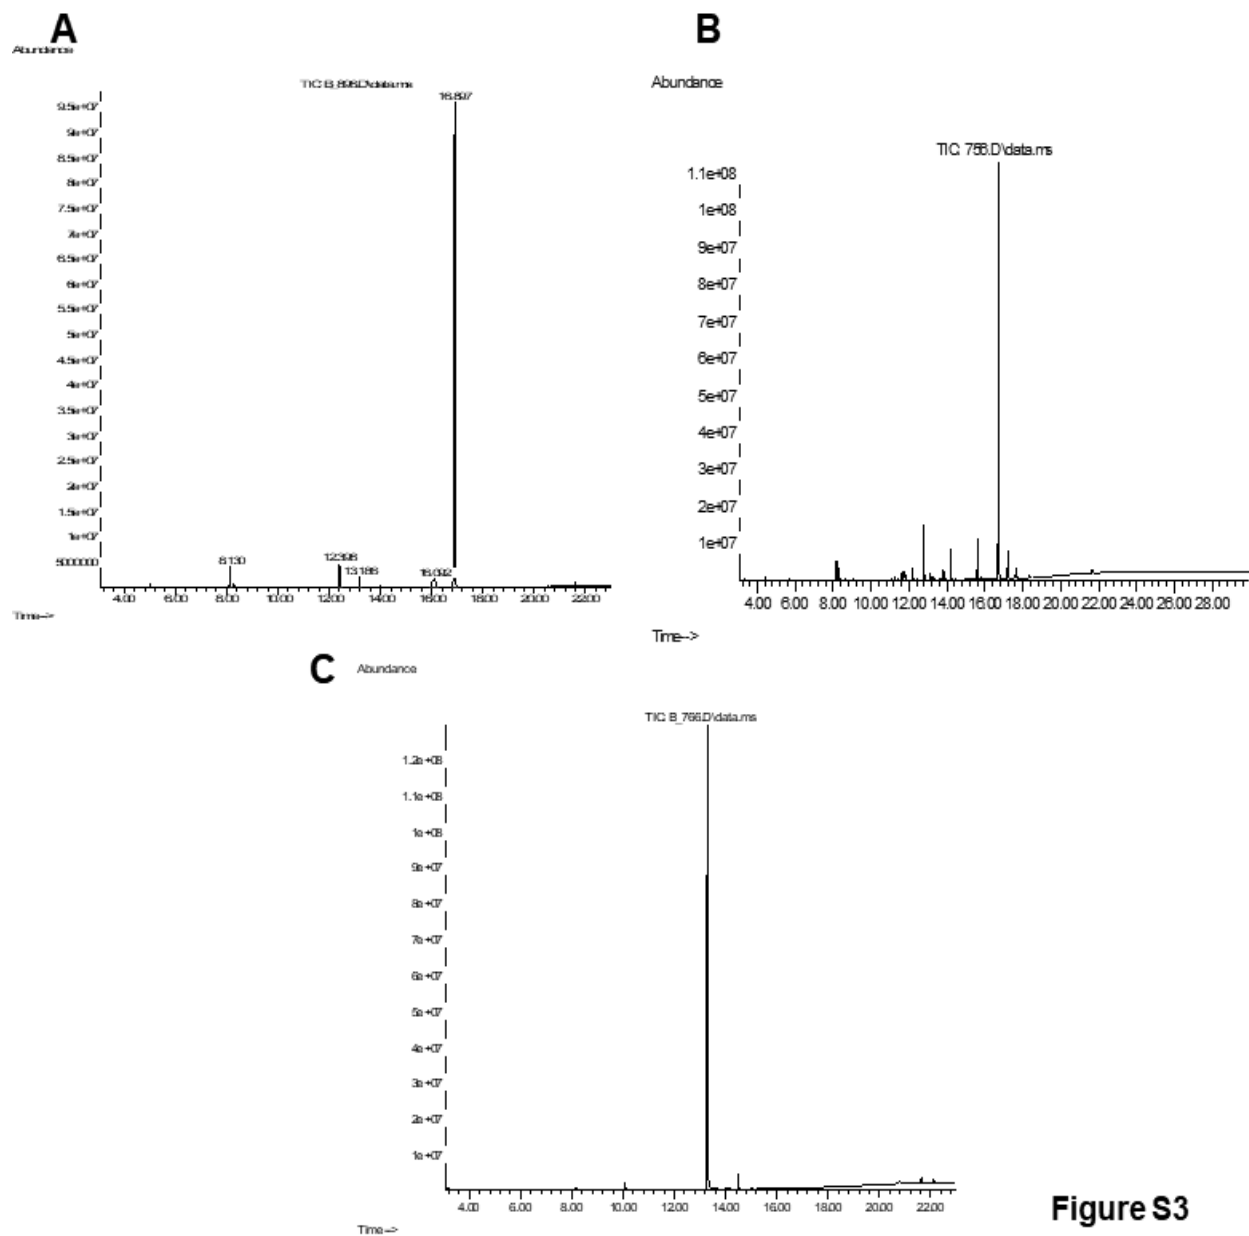

**Figure S3**

**Figure S3. Purification peaks and percentage purity of Ad-ITCs 8, 9 and 11 as determined by GC-MS. 8, 97.5% (A), 9, 95.9% (B) and 11, 99.2% (C).**

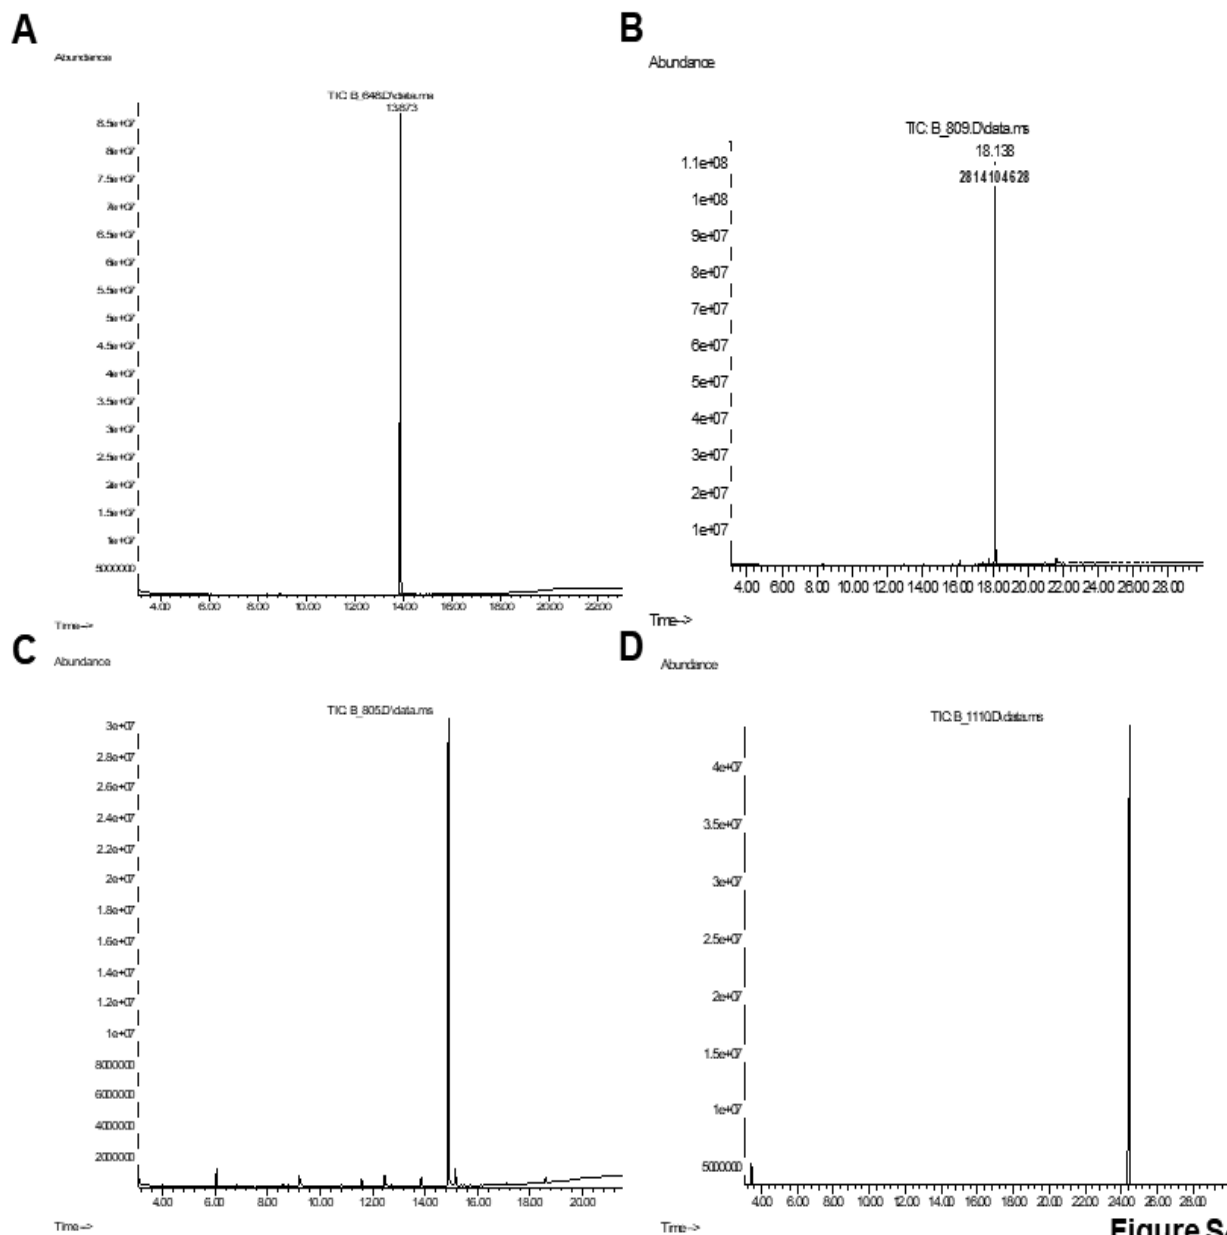

**Figure S4**

**Figure S4. Purification peaks and percentage purity of Ad-ITCs 2, 10 and 12 and Ad-compound 13 as determined by GC-MS. 2, 99.8% (A), 10, 99.5% (B), 12, 98.2% (C) and 13, 99.5% (D).**

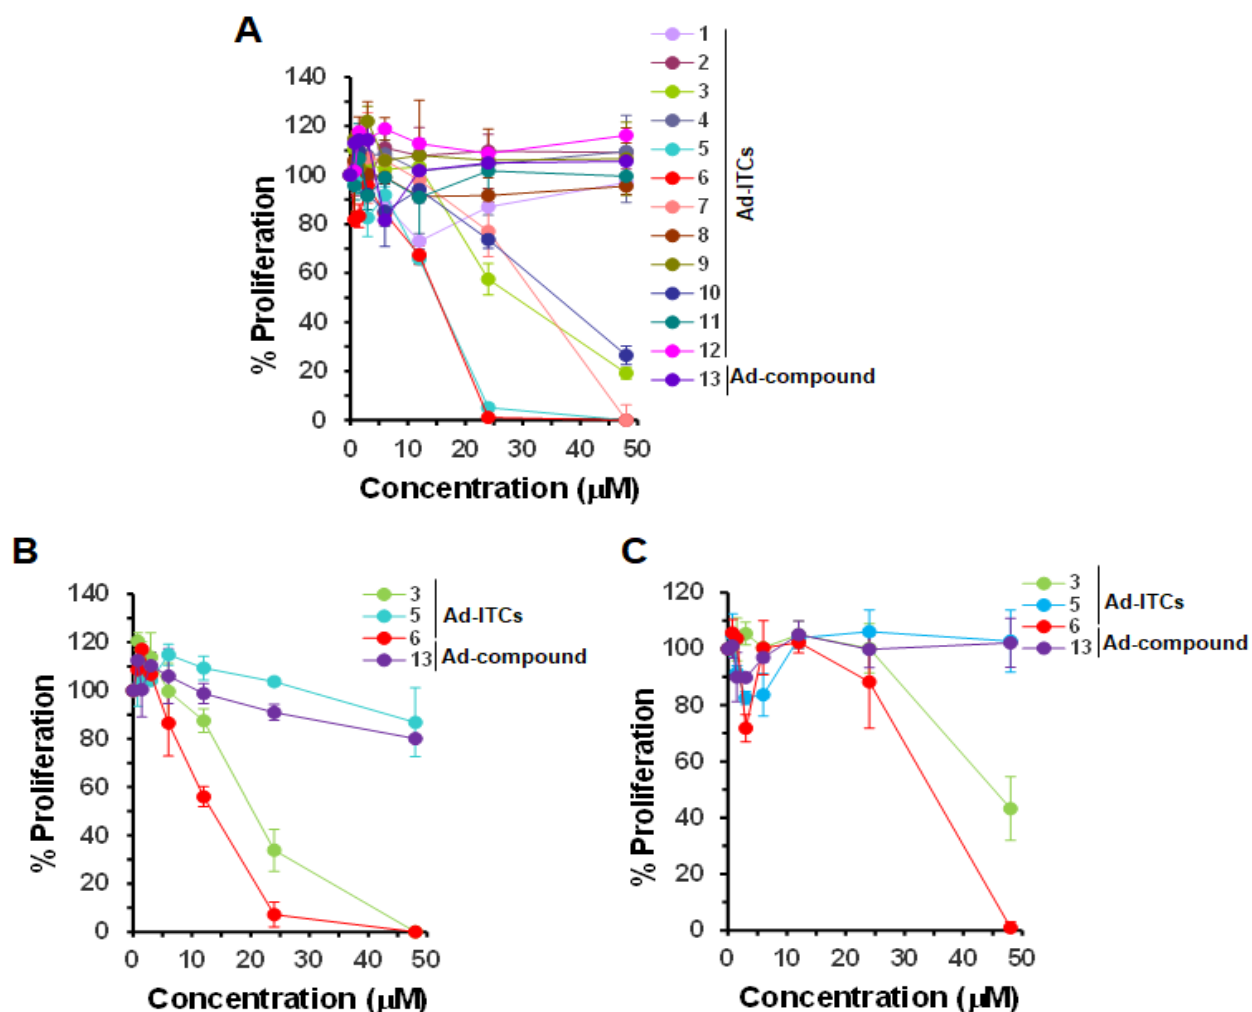

**Figure S5**

**Figure S5. Effects of Ad-ITCs on the proliferation of breast cancer cell lines expressing mutant p53 or WT p53.** (A-C) The mutant p53 (p53<sup>R280K</sup> MDA-MB-231 and p53<sup>R273H</sup> MDA-MB-468) and WT p53 (MCF-7) cells, respectively, were treated with DMSO (as a control) or different Ad-ITCs or Ad-compound **13** at the indicated concentrations for 72 h. Percent cell proliferation determined by WST-1 was calculated as the ratio of OD<sub>450</sub> values obtained for cells grown in the presence of the respective Ad-ITC or Ad-compound **13** compared with the presence of DMSO. Experiments were performed in triplicate. Error bars represents SD.

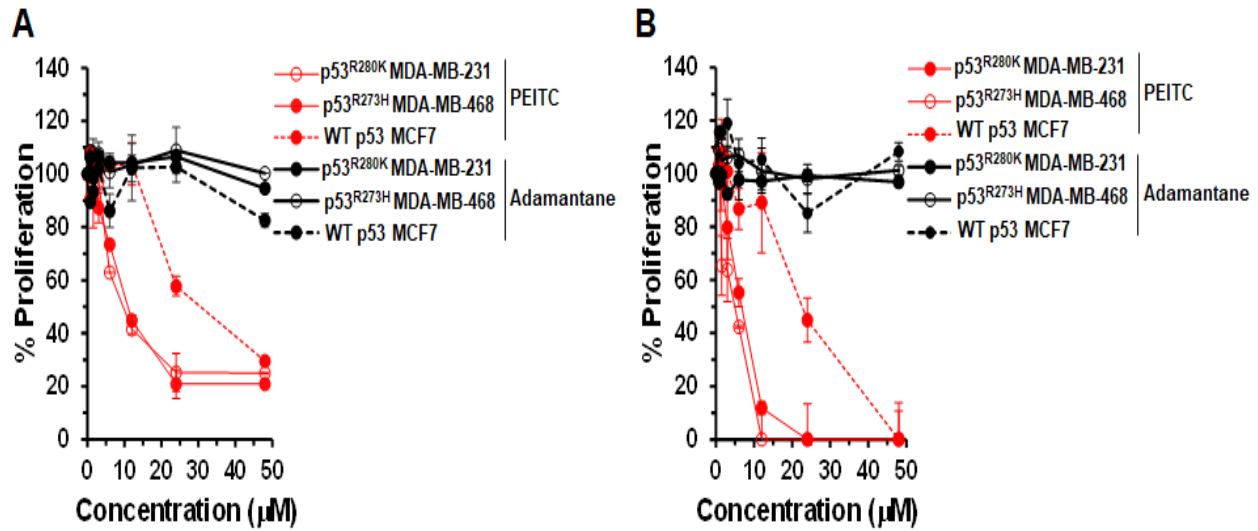

**Figure S6**

**Figure S6. Effects of PEITC and adamantane on the proliferation of breast cancer cell lines expressing mutant p53 or WT p53.** The mutant p53 (p53<sup>R280K</sup> MDA-MB-231 and p53<sup>R273H</sup> MDA-MB-468) and WT p53 (MCF-7) cells, respectively, were treated with DMSO (as a control), or PEITC or adamantane at the indicated concentrations for 24 h (**A**) or 72 h (**B**), respectively. Percent cell proliferation determined by WST-1 was calculated as the ratio of OD<sub>450</sub> values obtained for cells grown in the presence of PEITC or adamantane compared with the presence of DMSO. Experiments were performed in triplicate. Error bars represents SD.

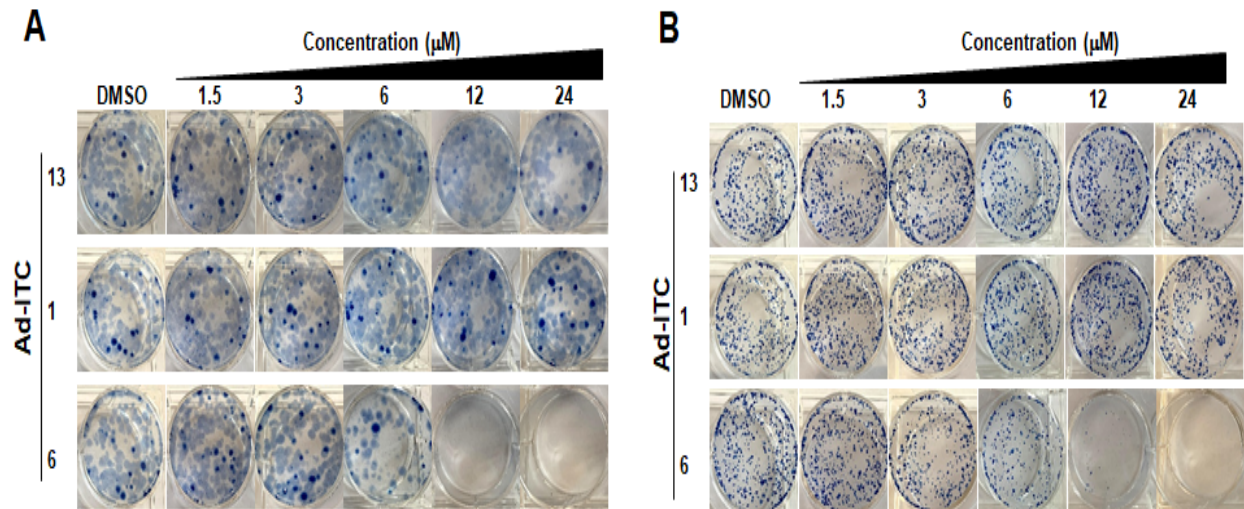

**Figure S7**

**Figure S7. Colony formation assay to determine the effects of Ad-ITCs on the growth of breast cancer cell lines expressing mutant p53 or WT p53.** The p53<sup>R280K</sup> MDA-MB-231 (A) and WT p53 (MCF-7) (B) cells were treated with DMSO or the indicated concentration of Ad-ITCs or Ad-compound **13** for 24 h. Cells were then allowed to grow in fresh medium lacking DMSO or Ad-ITC or Ad-compound **13** for 10 d and stained with methylene blue. Experiments were performed in triplicate. Error bars represents SD.

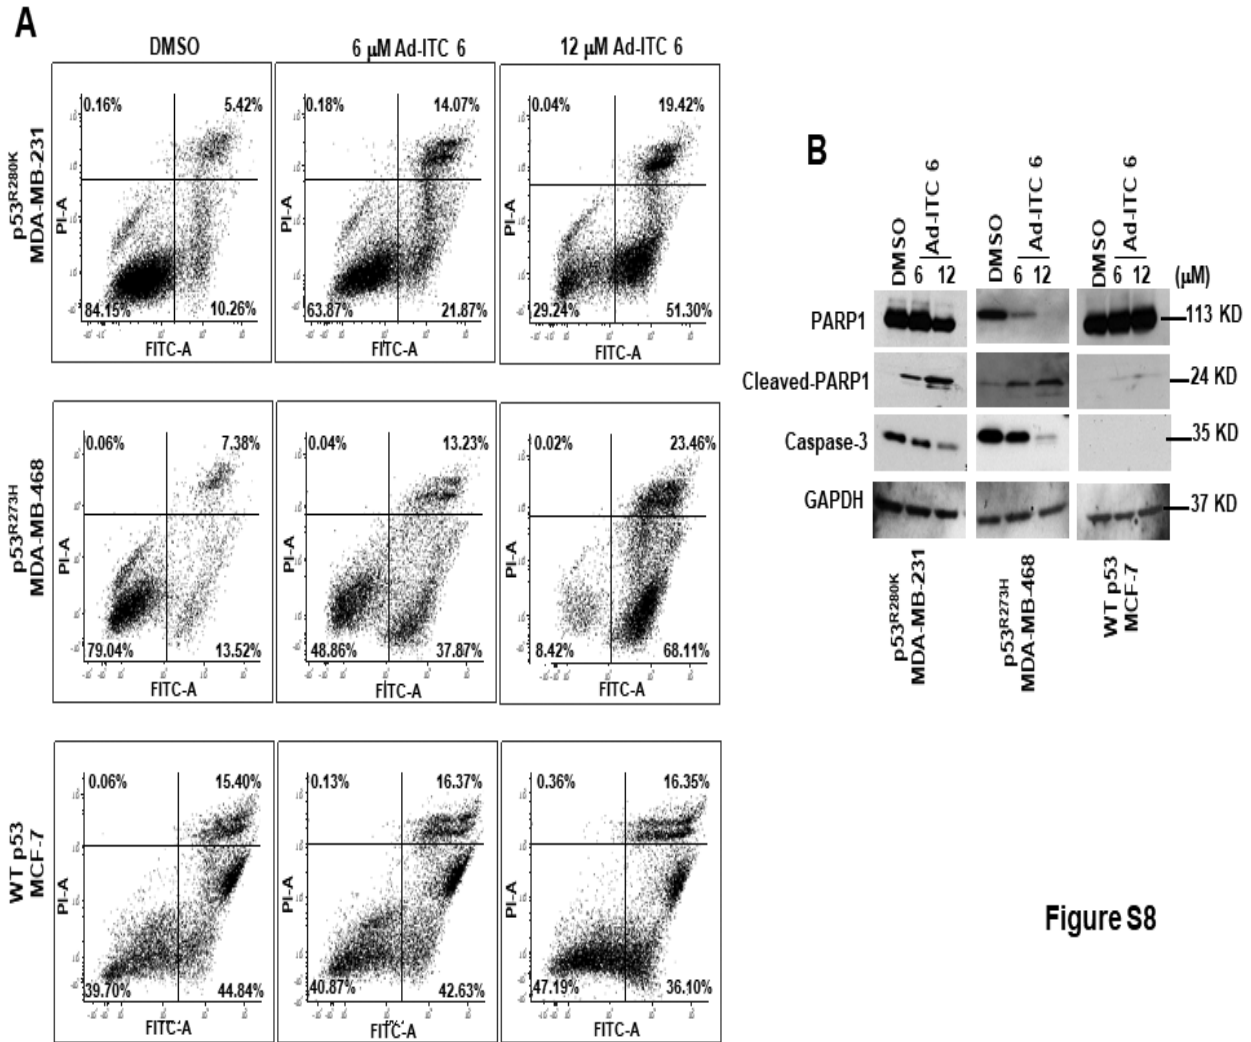

**Figure S8**

**Figure S8. Ad-ITC 6 induced apoptosis in breast cancer cell lines expressing mutant p53, but not WT p53.** (A) The mutant p53 (p53<sup>R280K</sup> MDA-MB-231 and p53<sup>R273H</sup> MDA-MB-468) and WT p53 (MCF-7) cells, respectively, were treated with DMSO (as a control) or Ad-ITC 6 at the indicated concentrations for 24 h. Apoptosis was measured by Annexin-V staining by flow cytometry using a BD LSRFORTESSA instrument. Representative FACS analysis plots of cell death measured by flow cytometry through Annexin-V staining. (B) Effects of Ad-ITC 6 on caspase 3 and PARP1 levels. The mutant p53 (p53<sup>R280K</sup> MDA-MB-231 and p53<sup>R273H</sup> MDA-MB-468) and WT p53 (MCF-7) cells, respectively, were treated with DMSO (as a control) or 6 μM or 12 μM of Ad-ITC 6 for 24 h. Cells were harvested and lysates were prepared. Hundred μg of

the lysate fractions were resolved by SDS-PAGE and probed with anti-PARP or anti-caspase 3 antibodies. Blots were stripped and re-probed with anti-GAPDH as a loading control.

Experiments were performed in triplicate.

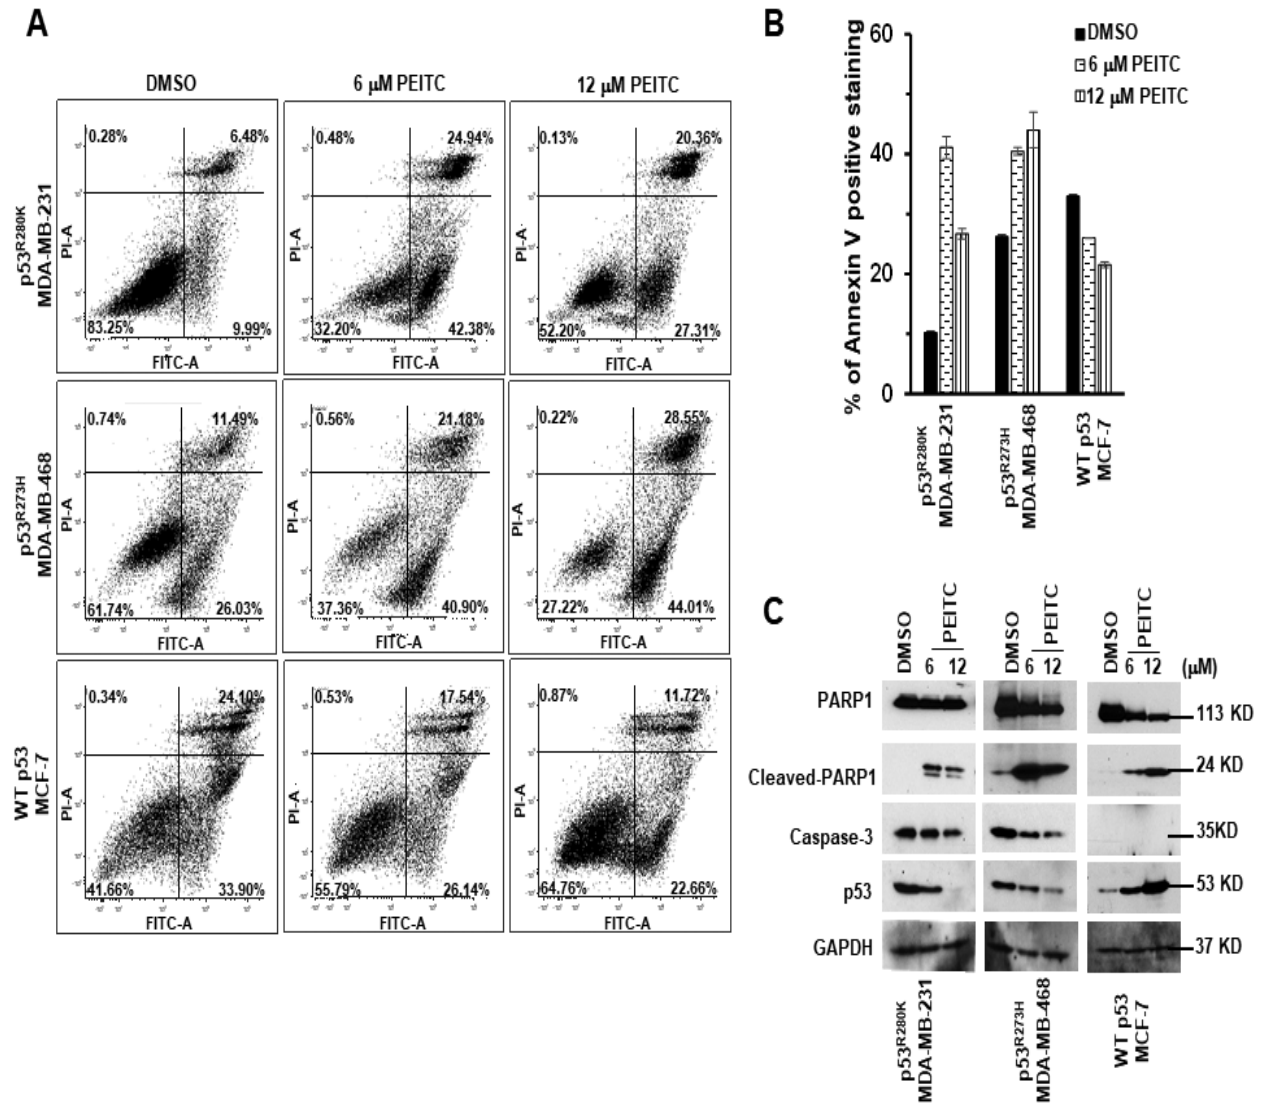

**Figure S9**

**Figure S9. Effects of PEITC on apoptosis induction and p53 levels in breast cancer cell lines with mutant p53 or WT p53.** The mutant p53 (p53<sup>R280K</sup> MDA-MB-231 and p53<sup>R273H</sup> MDA-MB-468) and WT p53 (MCF-7) cells, respectively, were treated with DMSO (as a control) or PEITC at the indicated concentrations for 24 h. Apoptosis was measured by Annexin-V staining by flow cytometry using a BD LSRFORTESSA instrument. (A) Representative FACS analysis plots of cell death measured by flow cytometry through Annexin-V staining, and (B) Percent of Annexin-V positive stained cells were calculated as the ratio of stained cells obtained

for cells grown in the presence of the PEITC compared with the presence of DMSO. (C) Effects of PEITC on caspase 3 and PARP1 levels. The mutant p53 (p53<sup>R280K</sup> MDA-MB-231 and p53<sup>R273H</sup> MDA-MB-468) and WT p53 (MCF-7) cells, respectively, were treated with DMSO (as a control) or 6  $\mu$ M or 12  $\mu$ M of PEITC for 24 h. Cells were harvested and lysates were prepared. Hundred  $\mu$ g of the lysate fractions were resolved by SDS-PAGE and probed with anti-PARP or anti-caspase 3 antibodies. Blots were stripped and re-probed with anti-GAPDH as a loading control. Experiments were performed in triplicate. Error bars represents SD.

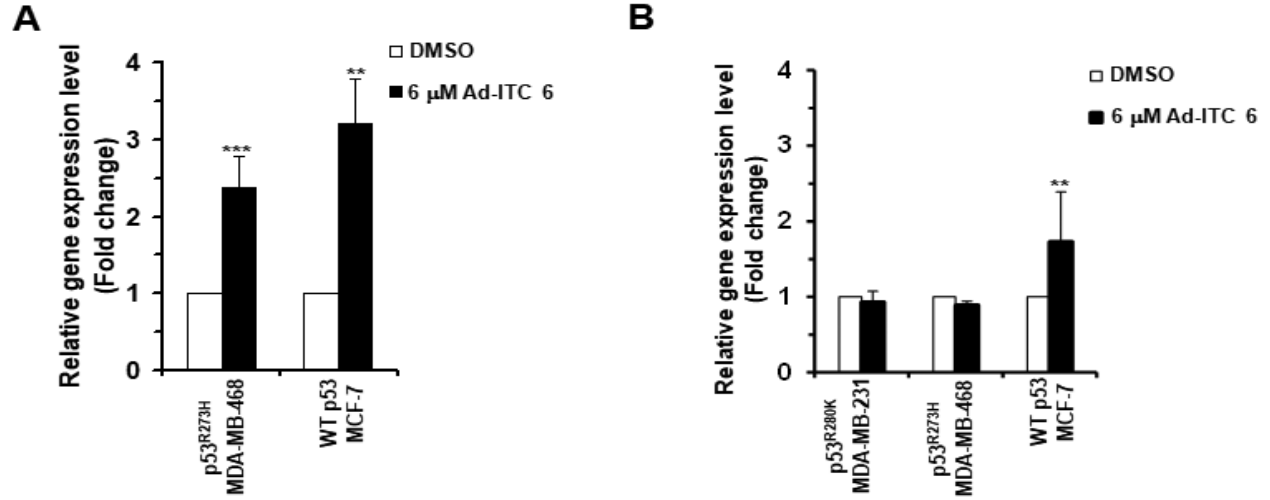

**Figure S10**

**Figure S10. Effects of Ad-ITC 6 on the expression level of TP53 and its canonical target**

**MDM2.** (A) qRT-PCR of p53 regulated downstream target gene MDM2 in mutant p53<sup>R273H</sup>

MDA-MB-468 and WT p53 MCF-7 cell treated with DMSO or 6 μM of Ad-ITC 6 for 4 h. (\*\*\*)

$p \leq .0005$  and \*\* $p \leq 0.005$ ). (B) qRT-PCR of p53 gene in mutant p53<sup>R280K</sup> MDA-MB-231,

p53<sup>R273H</sup> MDA-MB-468 and WT p53 MCF-7 cell treated with DMSO or 6 μM of Ad-ITC 6 for 4

h. (\*\* $p \leq 0.005$ ). Experiments were performed in triplicate. Error bars represents SD.

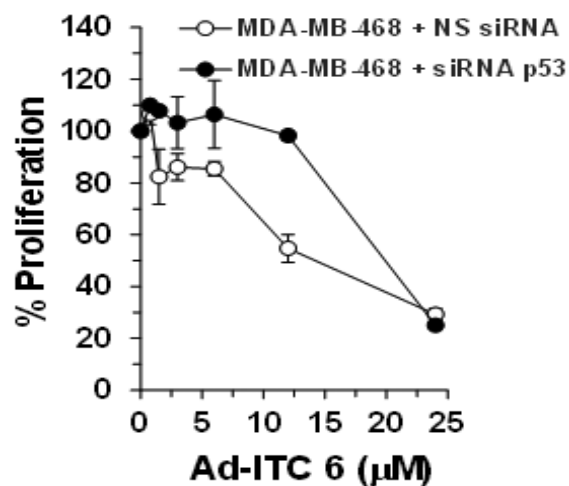

**Figure S11**

**Figure S11. Ad-ITC 6 inhibits MDA-MB-468 cell proliferation in a mutant p53-dependent manner.** p53<sup>R273H</sup> MDA-MB-468 cells transfected with non-specific siRNA (NS siRNA) or p53 siRNA were treated with DMSO or Ad-ITC 6 for 24 h. Percent cell proliferation determined by WST-1 was calculated as the ratio of OD<sub>450</sub> values obtained for cells grown in the presence of the Ad-ITC 6 compared with the presence of DMSO. Experiments were performed in triplicate. Error bars represents SD.

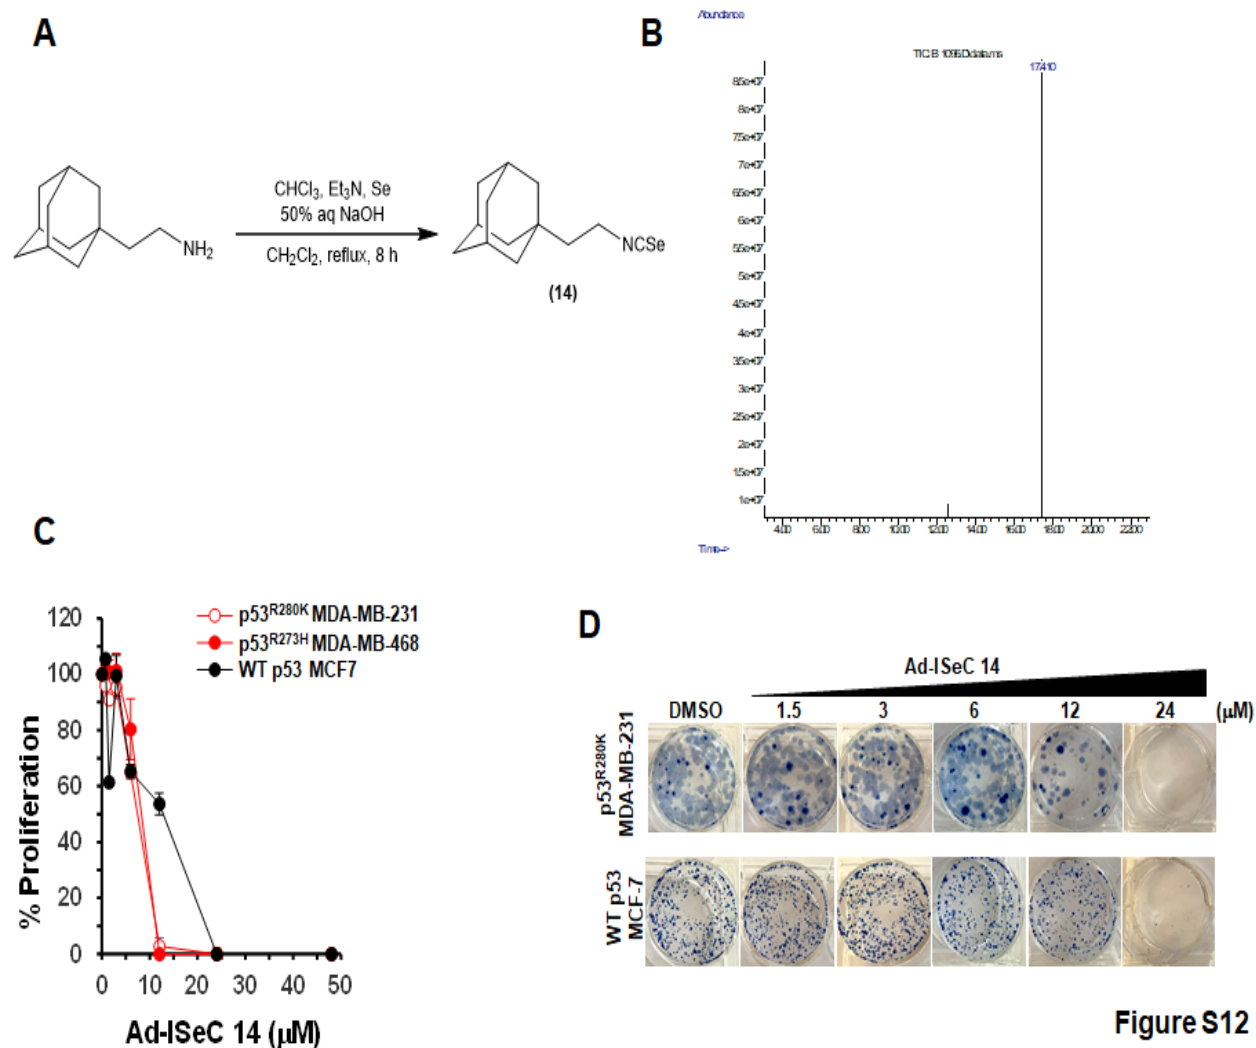

**Figure S12**

**Figure S12. Synthesis and purification peak of Ad-ISeC 14 and its effects on the proliferation of breast cancer cell lines.** (A) Scheme for the synthesis of Ad-ISeC 14. (B) Purification peak of Ad-ISeC 14 as determined by GC-MS. The percentage purity of this compound was 99.2%. (C) The mutant p53 (p53<sup>R280K</sup> MDA-MB-231 and p53<sup>R273H</sup> MDA-MB-468) and WT p53 (MCF-7) cells, respectively, were treated with DMSO or the indicated concentrations of Ad-ISeC 14 for 72 h. Percent cell proliferation determined by WST-1 was calculated as the ratio of OD<sub>450</sub> values obtained for cells grown in the presence of the Ad-ISeC 14 compared with the presence of DMSO. (D) Effect of Ad-ISeC 14 on p53<sup>R280K</sup> MDA-MB-231 and MCF-7 cell growth. MDA-MB-231 and MCF-7 cells were treated with DMSO or the

indicated concentration of Ad-ISEC **14** for 24 h. Cells were then allowed to grow in fresh medium lacking DMSO or Ad-ISEC **14** for 10 d and stained with methylene blue. Experiments were performed in triplicate. Error bars represents SD.

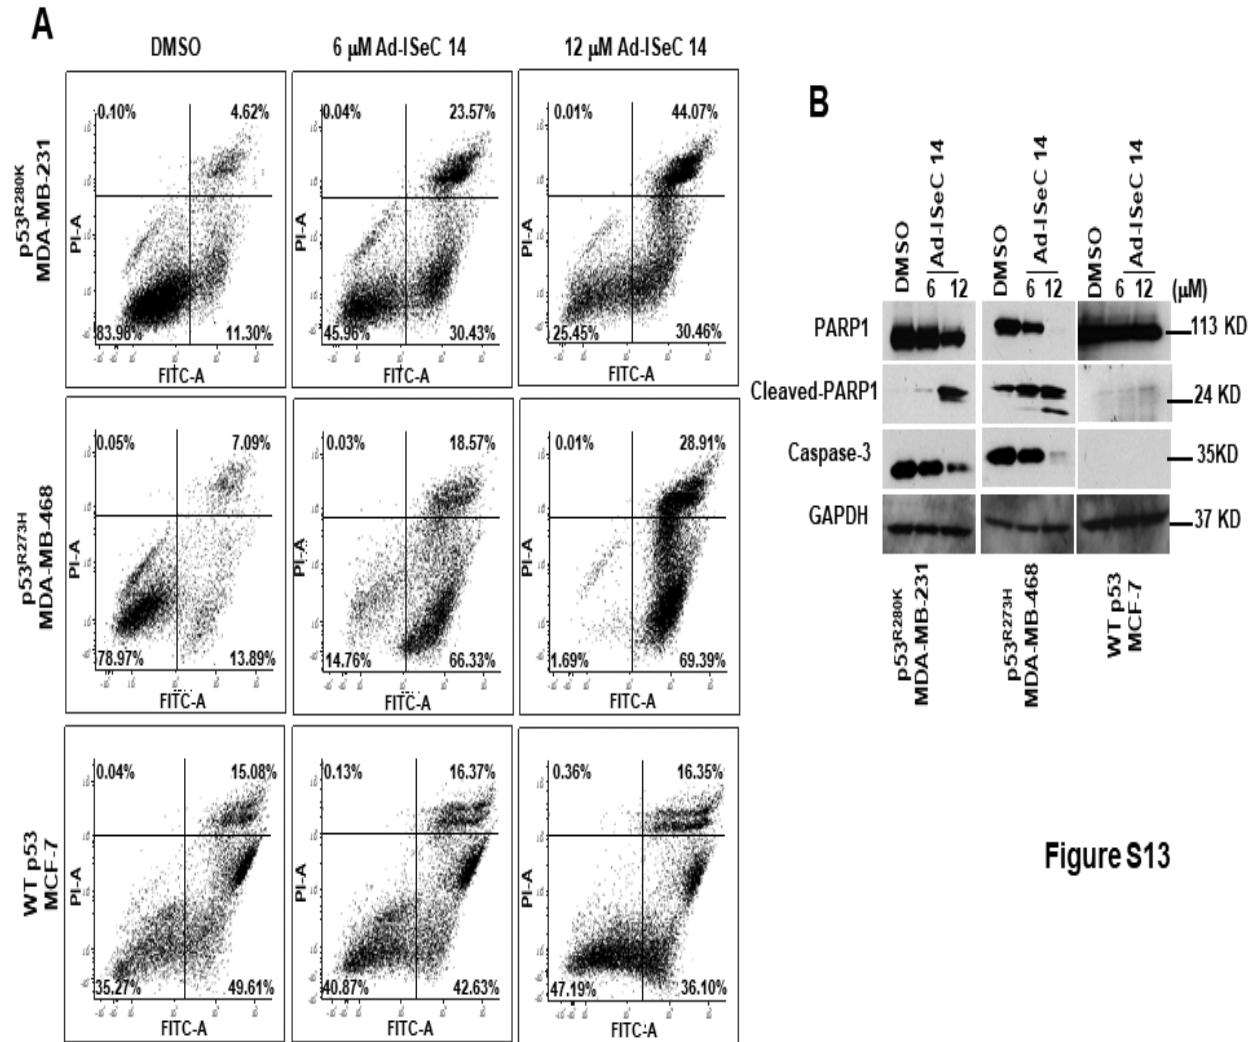

**Figure S13**

**Figure S13. Ad-ITC 14 induced apoptosis in breast cancer cell lines expressing mutant p53, but not WT p53.** (A) The mutant p53 (p53<sup>R280K</sup> MDA-MB-231 and p53<sup>R273H</sup> MDA-MB-468) and WT p53 (MCF-7) cells, respectively, were treated with DMSO (as a control) or Ad-ITC 14 at the indicated concentrations for 24 h. Apoptosis was measured by Annexin-V staining by flow cytometry using a BD LSRFORTESSA instrument. Representative FACS analysis plots of cell death measured by flow cytometry through Annexin-V staining. (B) Effects of Ad-ITC 14 on caspase 3 and PARP1 levels. The mutant p53 (p53<sup>R280K</sup> MDA-MB-231 and p53<sup>R273H</sup> MDA-MB-468) and WT p53 (MCF-7) cells, respectively, were treated with DMSO (as a control) or 6 μM or 12 μM of Ad-ITC 14 for 24 h. Cells were harvested and lysates were prepared. Hundred μg

of the lysate fractions were resolved by SDS-PAGE and probed with anti-PARP or anti-caspase 3 antibodies. Blots were stripped and re-probed with anti-GAPDH as a loading control. Experiments were performed in triplicate.

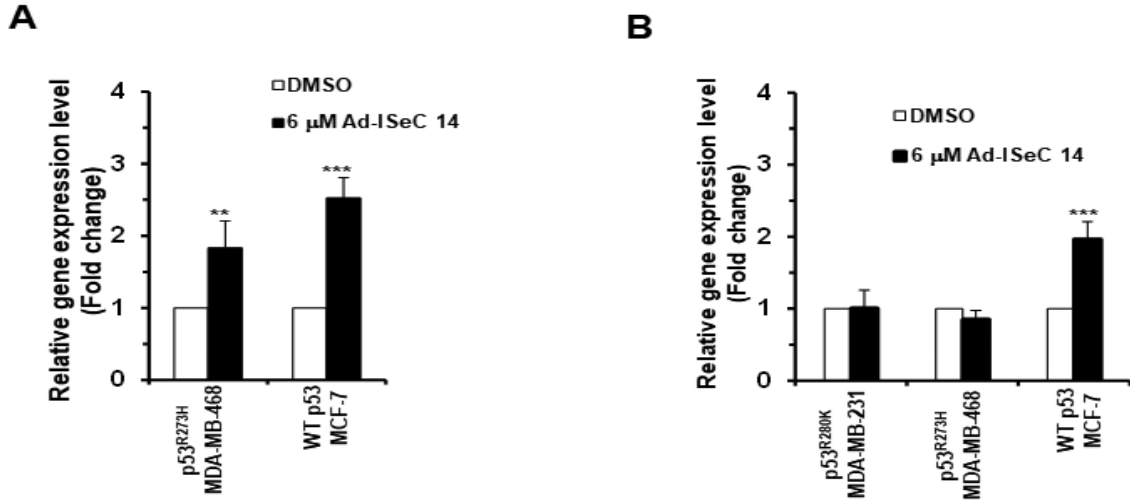

**Figure S14**

**Figure S14. Effects of Ad-ISeC 14 on the regulation of TP53 and its canonical target**

**MDM2 in breast cancer cell lines. (A)** qRT-PCR of p53 regulated downstream target gene

MDM2 in mutant p53<sup>R273H</sup> MDA-MB-468 and WT p53 MCF-7 cell treated with DMSO or 6 μM

of Ad-ISeC **14** for 4 h. (\*\*p ≤ 0.005 and \*\*\*p ≤ 0.0005). **(B)** qRT-PCR of TP53 gene in mutant

p53<sup>R280K</sup> MDA-MB-231, p53<sup>R273H</sup> MDA-MB-468 and WT p53 MCF-7 cell treated with DMSO

or 6 μM of Ad-ISeC **14** for 4 h. (\*\*p ≤ 0.005 and \*\*\*p ≤ 0.0005). Experiments were performed in triplicate. Error

bars represents SD.

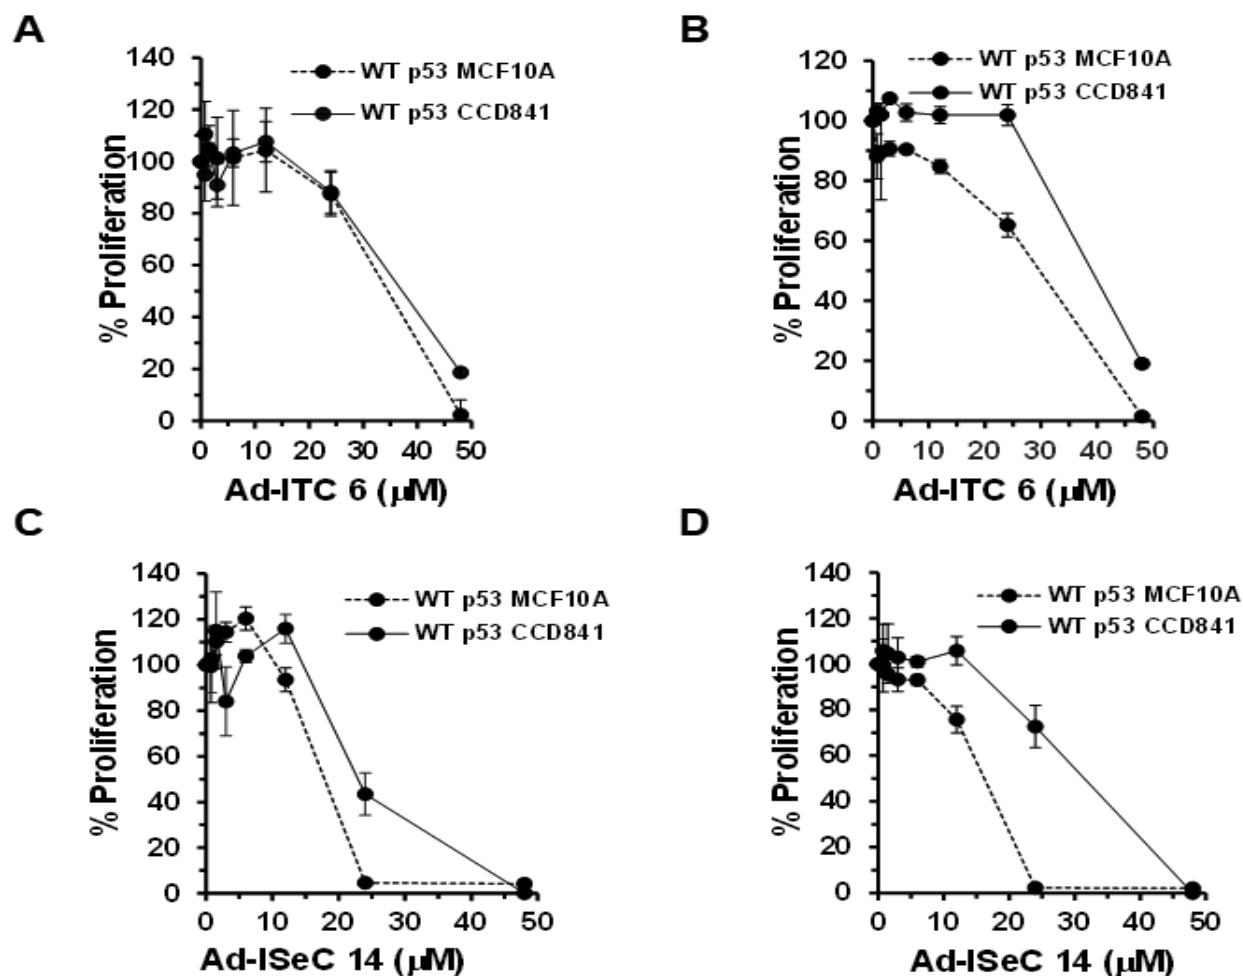

**Figure S15**

**Figure S15. Effects of Ad-ITC 6 or Ad-ISEC 14 on the proliferation of normal mammary epithelial cells or normal colon cells expressing WT p53.** (A, B) The normal mammary epithelial cells (WT p53 MCF10A) or normal colon cells (WT p53 CCD841), respectively, were treated with DMSO (as a control), or Ad-ITC 6 at the indicated concentrations for 24 h (A) or 72 h (B), respectively. (C, D) The normal mammary epithelial cells (WT p53 MCF10A) or normal colon cells (WT p53 CCD841), respectively, were treated with DMSO (as a control), or Ad-ISEC 14 at the indicated concentrations for 24 h (C) or 72 h (D), respectively. Percent cell proliferation determined by WST-1 was calculated as the ratio of OD<sub>450</sub> values obtained for cells grown in the

presence of the Ad-ITC **6** or Ad-ISEC **14** compared with the presence of DMSO. Experiments were performed in triplicate. Error bars represents SD.

**Table SI: LogP values of Ad-ITCs**

| Ad-ITC Number | LogP calc <sup>a</sup> | LogP exp <sup>b</sup> |
|---------------|------------------------|-----------------------|
| 1             | 4.53                   | 4.46                  |
| 2             | 4.38                   | 4.32                  |
| 3             | 4.54                   | 4.5                   |
| 4             | 4.87                   | 4.95                  |
| 5             | 4.82                   | 4.76                  |
| 6             | 5.08                   | 5.17                  |
| 7             | 6.21                   | 6.34                  |
| 8             | 4.51                   | 4.42                  |
| 9             | 5.33                   | 5.40                  |
| 10            | 6.57                   | 6.77                  |
| 11            | 4.65                   | 4.51                  |
| 12            | 3.87                   | 3.73                  |
| 13            | 2.92                   | 3.11                  |
| 14            | 3.94                   | 4.05                  |

<sup>a</sup> Calculated using Molinspiration (<http://www.molinspiration.com>) © Molinspiration Cheminformatics.

<sup>b</sup> Experimental LogP were measured by HPLC-MS (Chiang, P.-C.; Hu, Y. Comb. Chem. High Throughput Screen. 2009, 12, 250)
